# Supplementary material for: Serotonin modulates infraslow oscillation in the dentate gyrus during non-REM sleep
Source: eLife. 2025 Apr 3;13:RP100196. doi: 10.7554/eLife.100196 (PMC11968106; doi:10.7554/eLife.100196)
Supplement: Source data 1. [file elife-100196-data1.xlsx]

## Sheet: Figure1
Figure 1C				Figure 1D		Figure 1F					Figure 1H
Calcium activity of GCs				calcium oscillation		probability of outcome					MA-related
Wake	NREM	REM		cycle/min		Wake	NREM	REM	MA		Latency(s)	caclium Drop(Z)
0.99153	0.74549	1.9953		1.79		0.0227	0.75	0	0.2273		8.1773	-0.8858
0.77359	0.9029	2.1483		0.8		0.1132	0.6981	0	0.1887		5.6689	-0.8339
0.91149	0.93419	1.8106		1.09		0.1042	0.7083	0	0.1875		7.1739	-1.1148
0.95076	1.3451	0.94598		1.14706		0.0395	0.6711	0.0263	0.2632		4.9666	-1.494
1.2821	1.2752	1.1686		1.73529		0.0323	0.7581	0.0323	0.1774		5.9699	-1.4608
1.1755	1.5084	0.83334		1.35294		0.0337	0.8315	0.0112	0.1236		6.3712	-1.7055
0.80127	1.1239	1.7396		0.735294		0.0161	0.6774	0.0161	0.2903		5.3679	-1.5178
0.72324	1.2652	1.2652		1.32353		0.1	0.65	0.0333	0.2167		8.0769	-1.2274
0.89128	1.5241	1.6074		1		0.1034	0.5517	0	0.3448		5.5686	-1.4621
0.77639	1.4673	1.546		1.94118		0.119	0.3571	0.0238	0.5		5.2676	-1.0313
0.45229	1.0924	1.7117		1.0882		0.1087	0.6449	0	0.2464		6.0702	-0.8371
0.7179	1.482	1.2565		1.17647		0.0867	0.3571	0.0306	0.5255		5.4682	-0.8594
0.6761	1.4415	1.5015		0.823529		0.1073	0.4181	0.0282	0.4463		4.6656	-1.0646
Figure1 - figure supplements 1B									Figure1 - figure supplements 1E
osc-amp in NREM				osc-power in NREM					correlation between Sigma and calcium
T1	T2	T0	Tn	T1	T2	T0	Tn		wake	NREM	REM
2.5044	2.4812	1.8018	3.4516	0.1845	0.1346	0.0482	0.1638		0.036	0.3974	-0.0837
2.5898	2.4865	1.6447	2.983	0.2449	0.1865	0.0786	0.2301		-0.0123	0.4287	-0.269
3.0022	2.8288	1.869	3.1417	0.2467	0.188	0.1074	0.2491		0.2395	0.4864	-0.1752
2.6105	2.2624	2.3121	2.6866	0.2545	0.2169	0.1062	0.2372		0.0873	0.4469	0.1694
2.6299	2.2519	2.2002	3.2721	0.1917	0.2368	0.0657	0.2415		-0.2129	0.4502	0.2631
3.1611	2.7867	1.8981	2.9149	0.2623	0.2584	0.2347	0.2293		0.1798	0.3588	0.3215
1.2012	1.5076	1.3592	1.6557	0.116	0.2384	0.0638	0.0528		0.2058	0.4133	-0.0366
3.284	2.2534	NaN	3.3447	0.2429	0.2481	NaN	0.2462		0.5009	0.4302	0.111
3.425	2.7212	NaN	3.3588	0.2357	0.2482	NaN	0.2818		0.3564	0.4146	0.3124
2.6902	2.7331	2.4448	2.6008	0.196	0.1499	0.094	0.1595		0.1778	0.4964	0.5195
3.447	3.1277	NaN	3.6813	0.2836	0.2428	NaN	0.303		0.1239	0.2961	0.616
3.5985	3.7966	3.3657	3.8494	0.2025	0.3012	0.0786	0.3006		0.0786	0.2157	-0.0292
3.118	3.9464	3.118	4.1526	0.1487	0.3142	0.1487	0.258		-0.0552	0.2663	0.0899
3.1018	3.3109	2.0893	3.2267	0.1909	0.2059	0.083	0.2168
3.202	3.2336	2.0629	3.3375	0.2305	0.28	0.1094	0.3005
3.6127	3.1337	2.5867	3.5755	0.2454	0.2792	0.1107	0.2742

## Sheet: Figure2
Figure 2C				Figure 2D		Figure 2F					Figure 2H
Calcium activity of MCs				calcium oscillation		probability of outcome					MA-related
Wake	NREM	REM		cycle/min		Wake	NREM	REM	MA		Latency(s)	caclium Drop(Z)
0.64625	1.0137	2.2289		0.794118		0.0411	0.5753	0	0.3836		4.2642	-1.2631
0.82051	1.295	2.2522		0.823529		0.1176	0.2353	0.0588	0.5882		3.0602	-0.7842
1.5094	0.62098	1.9921		0.705882		0.075	0.675	0.025	0.225		5.8696	-0.23487
1.06	0.89811	1.9343		0.735294		0.04	0.7333	0.0267	0.2		6.2709	-0.8902
1.6763	0.38843	1.5525		0.705882		0.0541	0.7297	0	0.2162		6.1706	-0.285
0.9939	0.79943	2.2471		0.705882		0.1034	0.7126	0.0115	0.1724		7.6756	-0.6586
0.80027	1.0283	2.1977		1.6765		0.0476	0.7143	0.0238	0.2143		3.8629	-1.1037
0.33887	1.0396	1.7417		0.735294		0.0943	0.434	0.0755	0.3962		5.9699	-1.0561
1.0122	0.86503	1.9245		1.08824		0.093	0.4419	0	0.4651		4.9666	-1.0155
1.046	1.1042	2.3715		1.2647		0.0645	0.7097	0.0161	0.2097		1.8562	-1.0316
1.3127	1.2827	2.1937		0.764706		0.0244	0.6829	0.0244	0.2683		7.1739	-1.0748
1.0248	1.3216	2.2016		0.705882		0.0331	0.595	0.0165	0.3554		5.0669	-1.7452

## Sheet: Figure3
		Figure 3D					Figure 3 - figure supplements 1B				Figure 3 - figure supplements 1D						Figure 3 - figure supplements 1E
		calcium activity of GCs (DF/F %)					wake/sleep in pGCs mice				Up-regulated						Up-regulated
		Motion	Quiet	NREM	MA		Wake	NREM	REM		Motion	Quiet	NREM	MA			Motion	Quiet	NREM	MA
Up	mean	12.71	13.8114	18.1598	17.5642		26.233	32.098	0		24.8913	19.4238	24.6078	26.0396			36.9171	25.2331	29.9936	20.6865
	SEM	0.4057	0.3147	0.3929	0.516		28.557	29.203	0		38.6698	16.5644	16.6047	17.6438			43.6229	21.0315	28.3929	22.3267
Down	mean	25.8601	22.3963	16.1922	16.1219		4.7667	23.3967	0.3667		17.4166	14.3602	15.0171	14.852			29.4865	19.0075	31.628	21.7585
	SEM	1.4447	0.8922	0.3123	0.3839						9.0403	10.5792	14.3581	10.5844			28.037	20.2959	23.0307	28.4924
							wake/sleep in pMCs mice				8.4654	11.1751	17.2494	10.5451			29.2688	16.5176	23.9312	26.4546
							Wake	NREM	REM		9.7377	16.6509	16.8564	10.513			23.9497	22.4571	32.3456	19.2543
		Figure 3E					8.8017	45.287	3.9		10.4641	19.9233	23.55	15.244			26.3111	19.8736	20.8102	31.4006
		calcium activity of MCs (DF/F %)					12.723	42.59	3.6		7.2949	14.7517	17.1181	12.8997			22.3586	12.3016	18.2096	11.9508
		Motion	Quiet	NREM	MA						14.6631	10.5508	13.2731	15.2706			41.1325	22.973	31.3506	14.4342
Up	mean	23.0864	18.1289	22.62	18.2475						12.4459	18.5728	19.4252	15.8203			22.142	17.717	23.9189	17.9682
	SEM	1.1814	0.4951	0.5976	1.0037						12.7131	15.1849	15.4417	13.969			22.9431	27.6946	33.3959	32.2144
Down	mean	30.1135	26.0083	19.005	20.2098						12.5223	12.5721	15.7331	12.647			36.843	19.1014	20.7931	31.561
	SEM	1.3156	1.0213	0.6068	0.8323						11.3702	13.057	13.5012	10.9704			24.4995	20.6749	25.9651	18.239
											9.9843	13.9614	14.8667	11.8344			26.8873	19.7892	24.8019	27.0863
											34.7289	23.6262	24.3528	23.8425			18.6694	12.4912	17.5415	12.3204
											13.2019	11.0528	13.3709	11.1393			31.384	14.8799	21.51	20.6682
											13.2575	13.6731	15.7174	12.9417			13.5968	26.1425	27.8587	23.346
											16.9251	14.4102	16.7142	14.2907			19.2085	15.7542	22.1464	15.0676
											12.7727	11.3556	13.7471	11.8775			17.8832	16.1564	20.5355	22.3701
											10.2072	10.7521	11.3503	10.6476			38.6132	20.8565	23.8008	16.8706
											13.9613	14.0784	15.1417	14.6829			33.9395	19.3185	19.6892	18.8904
											14.5317	14.5055	17.8957	16.0337			23.5995	18.7333	19.1648	21.6705
											19.7816	22.7591	26.1889	29.6483			12.9271	18.7487	23.976	16.7542
											17.3654	18.1868	20.9824	24.5694			16.2467	17.4616	24.0575	51.768
											11.6087	12.9339	13.0263	12.2556			49.4501	18.8639	20.4416	16.9371
											13.7565	11.9514	12.0706	13.8316			18.9419	14.422	26.962	12.1006
											11.2594	12.8952	15.1289	11.9049			16.0533	17.3531	17.8517	18.4856
											13.3128	13.3446	14.6795	13.7527			14.3168	14.8877	21.968	16.3054
											9.3214	12.2346	13.5369	10.3105			23.2289	17.5855	23.3745	17.4513
											15.5346	15.8745	26.1666	43.3604			16.5686	18.1796	19.9497	12.9569
											16.7831	17.517	19.5343	23.1487			13.3157	10.4959	15.3055	8.5702
											19.7493	19.7211	22.2545	44.3589			32.1198	17.4424	22.3569	11.7583
											11.9088	16.416	23.9064	14.7096			31.0257	21.1689	28.8028	17.6803
											9.1202	13.1075	18.4384	11.2705			14.7104	13.3401	25.0265	12.1279
											21.6786	26.8702	32.7172	46.5873			32.1025	20.3731	21.7435	18.1239
											19.7866	19.5132	21.709	30.2507			18.9997	21.3785	24.9273	28.764
											13.7073	18.7536	23.4941	17.0503			20.7388	25.6638	29.3091	16.3742
											9.2199	15.4181	17.8136	11.8664			18.1075	19.5131	22.1866	15.1285
											12.6287	14.774	16.5966	15.0323			23.8007	17.524	18.361	11.0088
											12.5869	14.8366	16.4913	14.2685			14.7787	15.8444	23.6075	15.9054
											13.8233	14.0414	18.0947	17.5855			13.6184	17.2678	18.4671	14.5071
											14.6586	17.8964	24.2667	15.3839			15.3033	13.4079	17.8698	20.9075
											15.3718	15.6652	17.5094	13.824			24.7159	21.0488	21.986	16.5971
											10.9491	11.2998	15.1986	12.0701			18.438	21.3498	22.8312	11.5713
											21.518	24.6061	25.5071	18.3864			15.6969	13.9173	20.7338	12.1803
											17.3443	12.9601	14.2469	15.2188			27.9427	16.2055	20.6244	17.6939
											14.0564	15.8102	20.6147	13.1458			13.9538	19.1154	24.7456	12.0374
											14.194	14.0552	19.2272	13.5918			11.8852	12.8964	17.2048	14.7061
											14.5117	16.4244	21.5089	14.4881			24.3514	14.37	17.96	13.2132
											11.0396	13.9008	15.9954	11.9387			20.6868	19.022	21.288	12.838
											11.5998	16.6045	23.7041	21.6221			19.4796	16.2887	16.3202	15.4018
											15.8718	16.1225	19.6908	16.499			16.3378	16.8158	20.318	11.8829
											13.8168	16.6079	19.393	14.4653			19.4153	18.8617	21.7165	18.5119
											12.7909	10.3888	12.2296	11.6275			20.9686	15.1987	15.338	12.3391
											13.7424	13.5483	14.7432	11.5625			8.2329	12.0745	15.675	5.9903
											12.884	15.1178	18.722	14.4765
											13.5023	13.7023	14.3758	13.903			Down-regulated
											9.9077	12.4531	12.4878	10.1466			Motion	Quiet	NREM	MA
											13.6487	15.7423	15.7908	14.9751			30.3011	32.5174	30.3861	16.4664
											14.4997	15.4184	17.9877	14.7839			37.1978	30.8096	30.3504	25.8846
											16.0499	14.7225	16.5622	13.2794			38.2282	36.0769	26.0781	22.8384
											11.9826	13.309	13.8155	12.5123			16.57	15.1145	14.7717	9.93
											12.0184	10.5548	13.167	12.9114			60.3048	62.0947	30.4038	33.1603
											16.3554	21.1778	22.8746	17.7963			21.9297	23.9768	20.4073	14.5903
											13.8959	16.5744	19.1633	14.657			35.81	42.9798	19.6107	33.4257
											16.9724	13.2136	14.1875	11.8111			33.8984	18.2583	14.7075	16.496
											14.5052	15.0514	16.0076	15.6763			21.6388	22.4243	19.9511	17.3572
											12.9725	14.7212	15.7888	11.6913			46.1286	27.9531	21.0726	30.783
											13.3864	14.4378	14.6801	11.4674			41.205	28.3259	14.0443	25.0526
											18.3314	20.6642	20.7817	19.774			24.5587	21.5133	21.1955	20.3361
											11.6862	13.2656	16.9071	13.3661			58.1763	38.6737	24.7519	33.864
											17.9362	20.7239	22.8391	19.2085			15.2941	34.3064	18.6324	24.1461
											11.7031	13.6841	14.0734	11.168			45.4398	16.9962	16.9189	14.6422
											12.0354	13.3115	16.04	13.496			47.1595	36.9409	17.1759	30.2894
											13.8258	11.8198	13.9112	10.0889			26.4661	35.3118	34.1402	29.4229
											23.1806	24.6577	25.271	27.0182			29.4447	20.3396	18.9988	26.4993
											13.2847	13.5988	14.3877	12.0221			20.5599	22.5272	19.4591	14.5017
											12.4889	13.0485	13.3387	13.0777			32.9069	16.6456	8.455	10.7103
											13.5374	22.2381	24.323	25.8851			18.557	23.4099	15.9516	32.0443
											11.1385	26.1797	41.4628	43.5334			37.4479	31.1235	21.5008	23.4947
											7.5334	17.0259	21.7975	20.7567			34.961	26.2112	21.1962	23.6284
											11.3949	6.5571	17.1165	18.6157			35.918	22.7079	21.3839	16.0133
											10.4427	14.6538	25.563	25.7392			34.5741	30.3727	21.6126	22.0521
											8.9769	8.6427	27.5332	29.5508			37.5586	17.906	16.8475	25.704
											7.6393	13.0745	20.6268	24.1751			31.5461	25.3681	12.8519	19.4168
											8.0464	11.9342	14.4181	14.6781			31.1593	24.2752	18.9593	24.9178
											5.3337	18.9377	33.2061	30.8919			24.4818	21.8767	21.3344	24.1535
											8.2155	15.2019	37.0037	37.9828			19.5981	17.6011	16.137	15.8409
											7.7411	17.8059	25.0529	24.1982			28.2818	41.6525	32.1769	25.4025
											7.4662	10.9168	24.4058	19.9613			35.2226	28.947	22.0004	14.6612
											17.2359	9.4685	15.173	13.9349			35.5842	33.1293	21.9754	14.6214
											25.0815	17.1587	22.694	22.795			26.8076	22.982	21.4277	13.7584
											8.8838	7.8721	18.9651	18.1682			29.0458	19.3126	18.8678	24.534
											7.1807	9.1196	14.6624	16.1466			34.4213	30.6707	18.3387	26.2053
											8.3516	11.9082	21.7648	24.4798			37.4479	37.0309	20.7349	21.1987
											14.1952	10.6499	14.1089	12.0219			36.7893	24.8088	20.0194	13.1987
											6.7407	12.3953	15.7132	14.9134			23.5116	25.438	22.8978	14.0883
											12.726	25.9806	26.7799	26.7708			21.064	26.0532	19.1919	22.2589
											34.0938	10.6039	16.8389	16.7237			26.0138	28.1497	20.0103	14.0882
											12.8631	9.9798	19.7937	21.4278			35.7102	29.0436	21.1401	31.2535
											15.2088	16.5155	19.728	22.5161			41.6139	28.8118	16.7172	20.2865
											9.1427	14.1198	15.8929	14.6572			23.6483	27.1838	24.599	20.7263
											21.7623	14.0383	16.5208	17.6279			33.5153	22.9454	19.4299	21.7739
											5.8029	8.2381	18.8685	20.4314			20.9826	21.3268	16.6273	19.288
											7.3867	8.9529	13.1116	11.6445			45.3387	23.076	13.1718	20.5857
											7.9463	12.2854	20.9082	21.6229			7.8529	14.418	7.0234	8.1596
											19.8795	19.3636	21.5448	22.5198			25.8157	25.5248	23.5603	13.535
											9.8198	9.4879	15.263	18.3772			21.3766	21.8314	19.9829	18.902
											12.0891	12.9813	15.87	17.8669			24.9176	22.1928	18.9903	15.0653
											8.4516	6.6871	12.8406	12.6486			37.3743	23.6494	16.6805	22.1936
											5.374	18.3146	19.7959	19.7837			35.9906	38.6293	14.6338	28.7039
											10.1535	11.1523	14.2836	15.2895			38.81	27.6872	20.795	17.8364
											10.2036	21.9114	24.8269	26.3275			33.6376	32.1684	11.8752	23.1823
											12.9338	15.6872	15.6959	16.7471			20.9047	20.8356	15.8168	25.3475
											8.8976	10.1318	12.4415	13.3157			29.1724	25.0921	18.0815	28.7958
											7.1964	9.9926	17.3449	16.2961			25.506	21.1115	21.0288	13.9806
											17.6445	16.4322	20.0379	18.8278			28.0431	20.6502	12.3165	25.458
											4.4163	9.2696	14.1849	18.1718			30.2794	17.1254	12.7319	10.3097
											13.8638	9.3496	12.4658	14.1613			64.7568	48.7062	16.1456	34.2575
											19.9465	12.566	24.7569	24.8004			23.9261	17.8209	17.3795	12.3868
											11.6146	8.6165	13.1522	14.001			15.7737	15.7675	12.867	12.0704
											8.6391	8.5242	11.2927	9.4672			13.1907	16.4754	15.5381	17.9376
											11.0524	12.6691	19.0666	17.5122			18.5764	21.8445	18.3259	8.7807
											27.1282	11.2088	23.0163	24.1489			17.6423	21.6026	18.4309	14.0711
											5.9811	12.5905	15.8538	13.8854			19.1862	18.2968	17.5524	14.2279
											10.3007	10.7924	13.2465	13.1024			18.9581	19.9448	16.9302	14.0767
											15.5005	9.4538	16.4161	17.5706			12.9202	19.9626	13.693	11.6387
											12.9768	6.9981	18.9684	16.504			19.3122	14.0431	11.359	8.18
											6.9401	10.9834	16.8225	20.8306
											8.796	8.769	13.6142	12.8638			unchanged
											10.6376	12.2717	23.3981	21.4273			Motion	Quiet	NREM	MA
											10.539	13.1974	18.7683	18.5182			44.8153	24.4488	35.2485	23.3899
											11.1062	8.4416	10.9434	9.3846			24.1411	22.5314	23.5783	21.9266
											15.7053	15.6108	17.5498	21.2569			25.7414	12.5487	19.1421	8.5779
											15.9999	20.9414	22.1183	23.8679			11.2247	14.501	13.2074	9.688
											10.8198	18.2899	19.5708	17.9826			16.3557	11.6689	13.6554	15.1664
											9.912	12.8483	18.042	18.7412			25.194	26.8467	25.7585	34.8516
											10.7024	10.0261	12.4125	10.8796			28.873	21.4355	24.3028	23.7578
											22.2367	16.1514	17.3274	18.6201			19.37	18.2675	18.648	12.1893
											4.6506	8.003	8.9759	8.2621			13.5064	18.621	16.5075	14.5276
											10.0417	8.5292	10.9736	9.9435			14.7368	19.5303	18.2669	8.7618
											14.0416	13.595	19.373	19.7043
											2.5967	5.9377	12.4351	11.5579
											17.7329	12.4058	13.6373	14.6621
											12.5042	13.9629	16.7133	16.8031
											8.2212	7.2079	22.6155	25.0843
											12.9049	15.0362	19.2775	20.2948
											12.0414	17.0022	23.4698	26.9174
											12.0675	12.7758	14.1925	12.6901
											12.3485	7.464	12.0424	12.9388
											4.1136	9.5215	13.0426	14.3888
											6.911	9.7374	14.3176	16.3932
											9.3091	9.3222	12.4857	11.6971
											9.8203	8.9827	15.7259	17.9953
											13.3513	10.3606	18.3003	16.8936
											9.2307	13.0147	25.0279	25.1677
											17.7171	14.6818	19.7889	20.1746
											18.8505	15.0301	35.4137	35.8135
											5.3442	10.0084	24.8693	28.1909
											10.72	12.5812	21.0757	18.2188
											10.5267	11.8662	18.0601	19.5041
											17.7646	17.7889	26.3143	23.728
											4.9791	19.0282	20.8537	20.4341
											5.8645	9.4641	13.1931	12.8646
											12.3268	16.7692	22.6659	22.6491
											4.706	12.3043	19.1813	20.6249
											15.7786	11.7986	14.9383	15.1329
											9.0288	12.9507	13.3276	12.6137
											8.0896	7.4381	13.1756	13.6011
											14.8704	13.2271	19.1788	19.1529
											6.0068	15.6261	15.6435	16.7111
											10.297	11.7081	14.3857	13.5183
											11.8009	9.0397	12.9593	11.6439
											4.7365	6.065	9.4814	9.4673
											down-regulated
											Motion	Quiet	NREM	MA
											31.3566	17.23	13.4719	9.0285
											36.8961	16.4684	13.314	11.9553
											29.1103	17.9299	14.672	14.7307
											26.7217	18.9079	14.0038	12.3488
											19.2999	15.5122	11.865	10.7885
											29.0328	14.7805	13.9826	11.6703
											27.3557	19.0947	18.0105	10.8339
											21.9199	14.7189	12.8193	12.8783
											65.4117	24.9722	17.7979	34.0202
											28.7523	28.303	18.246	16.9601
											24.4671	21.1799	19.7286	16.6226
											19.1361	20.9744	15.8615	13.9902
											22.6509	36.8842	29.7132	30.8769
											33.8986	31.1236	27.2749	23.8992
											19.4337	24.0877	15.9545	13.2773
											21.9554	13.4605	11.8005	11.7524
											19.5672	20.9703	16.0484	13.8886
											11.3932	20.6513	19.1068	11.2694
											21.6176	17.2642	13.2155	11.8984
											19.2766	17.4185	15.055	13.5796
											15.5315	15.0799	12.8938	14.2259
											11.6974	10.3466	7.6598	7.8743
											21.4631	15.464	14.3856	15.2734
											19.5956	22.6807	16.3568	14.2829
											17.343	16.5472	15.723	14.0959
											16.1148	18.0177	14.1498	13.5545
											11.1096	19.0742	15.2926	11.6121
											17.7182	15.0099	11.2842	9.1275
											21.4538	16.1941	14.5294	16.5053
											17.2081	19.6777	16.5837	14.3819
											16.5455	16.68	14.2442	10.5726
											12.5962	13.4929	12.4992	12.1841
											21.2682	16.0858	14.6121	14.1584
											16.1993	19.5003	19.1474	18.7296
											11.3667	13.6684	10.6124	11.5106
											16.9154	22.5773	17.0162	15.1916
											14.6109	14.4243	14.3154	10.6073
											15.979	20.8082	17.4151	13.991
											12.4328	19.2902	17.4477	16.5111
											10.4086	15.3299	14.255	14.1379
											34.7812	26.098	22.3216	26.8463
											20.8888	19.5145	18.4238	18.0309
											25.5884	19.7752	19.7417	17.6926
											15.8223	17.1259	15.3472	14.5478
											11.7314	11.9174	10.4391	10.692
											9.6153	11.6381	10.9074	10.3452
											41.5375	30.6783	16.983	26.2025
											38.1242	31.3196	21.7963	32.1261
											25.6095	25.4845	15.3145	14.8857
											36.6136	21.7612	20.2331	18.9217
											23.7827	21.8161	13.971	20.0144
											15.9131	21.0942	20.9397	16.4841
											15.8381	21.6621	20.5917	23.6138
											20.5707	20.4138	13.6647	17.513
											33.0137	27.167	20.7129	24.6018
											18.4703	20.5431	14.3635	11.754
											22.0983	15.1578	10.1275	11.6086
											22.0448	19.2517	15.1349	17.1416
											18.1008	17.3449	12.955	13.738
											22.783	19.385	17.0981	18.2917
											17.8402	20.5101	14.811	15.5349
											21.6586	27.475	18.201	21.2717
											22.058	17.4838	16.7449	19.658
											23.5093	19.4355	15.9046	13.3535
											21.8979	18.2528	13.7523	16.9449
											17.1763	20.1133	15.3029	13.979
											13.9288	16.9134	14.4387	18.6036
											29.4249	28.5972	25.3599	24.4971
											22.2297	22.2987	17.4355	15.0156
											15.327	15.7757	13.7269	14.0326
											21.8005	19.3769	15.9712	19.7089
											14.6549	13.1565	12.4991	11.8024
											16.6316	14.8151	12.8024	11.4582
											17.9931	21.95	19.0625	24.7525
											26.5741	24.3379	22.3505	24.1751
											18.0044	17.8402	15.1477	19.103
											19.8455	18.9561	15.2364	12.8619
											19.3563	16.9087	16.4141	14.0018
											17.5661	19.3089	16.5455	14.3196
											15.9501	15.6663	15.0447	17.9606
											11.5711	16.7219	11.1219	10.4274
											14.6055	17.1125	14.1353	12.9393
											18.3462	16.259	14.8609	12.5833
											25.0521	17.5845	14.7276	19.1135
											17.7775	15.9626	14.7088	14.4676
											15.8933	15.3994	12.0407	10.8166
											28.4162	20.5051	16.7477	19.7578
											19.6928	16.6927	15.81	17.669
											17.7092	13.4473	11.1695	10.9315
											17.4654	16.9152	15.5668	16.3181
											16.5639	14.2486	13.6711	13.5629
											20.4301	19.726	15.1475	15.9357
											26.6238	20.5373	18.8228	19.7591
											16.1823	14.2222	12.818	15.1594
											13.5024	12.6268	12.2423	12.6051
											16.3216	16.7866	15.8067	15.1419
											18.1515	18.4276	15.7627	13.4285
											19.0248	12.3062	10.7202	9.7513
											25.6588	28.2234	23.2056	27.8426
											15.5029	16.7154	15.0769	14.5253
											16.6462	17.4443	14.0277	13.1707
											15.234	16.7057	15.5457	13.4823
											14.46	15.5996	14.2196	13.3606
											17.2496	16.0527	14.1126	17.365
											18.1295	15.1556	14.8212	14.8455
											25.9512	25.6043	21.7595	22.7226
											18.5861	15.9607	14.557	14.402
											19.6803	15.1845	14.4423	16.1554
											18.1595	13.1762	11.6279	13.4685
											11.9874	13.0136	12.0126	9.9354
											22.0746	27.4843	25.9806	31.2708
											16.2337	16.407	14.4353	18.7908
											14.7124	16.4507	13.8735	15.6255
											11.4787	15.4098	15.3814	13.239
											15.2494	13.3214	11.9402	14.9797
											19.0945	17.7885	16.8759	18.3654
											26.5467	23.1824	22.0317	22.4555
											67.8861	89.4614	26.9445	26.4912
											114.05	77.6715	17.5574	15.0668
											110.695	41.8225	21.1304	19.3728
											32.7849	50.8798	12.6205	10.1928
											31.098	33.3003	27.7841	24.5163
											73.8432	24.5501	13.8586	11.9669
											79.9677	48.9345	23.7018	22.654
											45.9113	48.1071	23.0465	22.6889
											50.3866	62.2155	26.7449	23.2966
											7.541	25.2969	14.1462	13.725
											30.7389	49.4745	19.7298	17.8587
											56.7065	40.5975	14.0617	14.147
											45.0988	23.9792	14.0926	13.7505
											7.0952	14.0757	13.3574	14.5724
											7.5268	17.8828	15.1314	14.556
											29.1272	23.6485	22.2565	22.757
											35.7781	27.3252	14.8557	15.397
											29.7852	24.8137	17.6022	19.1364
											62.9093	33.7874	19.2131	18.9659
											28.3778	29.6368	20.176	18.2168
											10.0211	20.2325	16.9177	15.4495
											21.1624	27.9789	20.2296	19.2901
											41.4881	21.7203	13.5213	13.0654
											29.862	35.5328	29.5853	28.3207
											35.5337	17.0532	15.4822	14.3665
											15.0101	24.4379	16.3811	15.9111
											9.2433	15.8715	14.2951	12.7764
											14.1366	13.1793	12.4002	13.0858
											10.9357	11.6303	10.1497	11.5062
											6.6665	17.7773	13.3468	13.8263
											19.3768	14.5397	11.8707	11.5689
											89.0344	58.3483	17.6533	14.9376
											84.688	48.5249	13.6154	13.6403
											87.4496	41.3073	19.5334	15.9485
											55.244	24.2673	16.556	16.8859
											60.5545	38.7788	14.3622	13.3825
											48.2247	29.2428	18.3575	16.3384
											50.5896	26.5109	14.7817	14.5573
											10.4272	19.0701	16.2252	16.5878
											8.3755	17.9777	16.2331	15.6555
											21.7481	17.5043	12.0595	12.0832
											11.3716	20.5271	19.1612	14.5733
											42.4147	33.9416	13.0741	10.8155
											41.5472	29.4505	22.7234	23.93
											27.7889	20.7749	14.6185	14.659
											unchanged
											Motion	Quiet	NREM	MA
											15.4966	18.2575	16.832	14.9461
											13.021	13.8871	13.875	9.8583
											12.042	12.1393	11.9795	11.1836
											10.2472	12.4925	11.032	9.1339
											13.8026	16.2404	14.5912	13.5611
											12.604	14.0937	13.2231	10.5153
											13.8969	19.1725	15.8976	12.3835
											19.7988	18.9254	19.4415	16.4744
											17.232	16.5233	16.5894	16.2545
											13.3082	13.827	13.5627	10.9424
											9.6395	12.6077	11.0478	8.8927
											18.5825	16.4411	17.4492	17.2987
											15.117	16.1516	15.6097	17.2336
											13.4731	13.5883	13.4831	15.1918
											18.3894	17.1159	18.0187	19.5969
											11.4019	17.0354	14.4642	15.6297
											13.9584	14.2803	14.1585	11.4615
											13.5164	11.3014	12.6145	9.7595
											16.0477	12.8853	13.9885	13.9817
											15.736	13.7174	14.4449	13.9454
											15.5917	14.9018	15.4611	18.5206
											13.9326	14.6123	14.148	12.9472
											28.4997	29.4958	28.5482	27.0117
											6.1177	15.0298	10.3532	10.1771
											15.584	11.2368	13.972	14.5808
											13.7648	12.6739	12.8228	12.2422
											17.9394	14.1553	15.5131	15.0835
											9.2535	24.4822	17.7861	16.9578
											18.3192	17.2744	17.8848	20.0019
											11.6362	15.3764	14.0407	14.0668
											8.8682	16.4985	12.353	12.2101
											14.3435	15.2583	14.636	14.3653
											14.1256	19.2426	16.1585	14.581

## Sheet: Figure4
	Figure4C					Figure 4D				Figure 4E
	Wake	NREM	REM	MA		Wake	NREM	REM		cycle/min
	0.086957	0.56522	0	0.34783		1.5061	0.86398	0.43399		1.1075
	0.041667	0.58333	0	0.375		2.02	0.6467	0.15789		1.0723
	0.1	0.55	0	0.35		1.6632	0.99193	0.54116		1.3801
	0.059701	0.56716	0	0.37313		2.1986	0.99839	0.24718		1.3905
	0.039216	0.68627	0	0.27451		1.9921	0.84095	-0.05222		1.2729
	0.068966	0.51724	0	0.41379		2.0272	0.93284	-0.02388		1.0369
	0	0.48889	0	0.51111		2.4135	0.62128	-0.01791		1.0922
	0.02381	0.66667	0.02381	0.28571		1.8788	0.8118	0.12685		1.2216
	0.016949	0.62712	0	0.35593		2.0614	1.5553	0.086816		1.2385
	0.019608	0.60784	0	0.37255		2.0697	1.011	-0.24489		1.1525
	0.042553	0.61702	0.021277	0.31915		2.0971	1.2126	-0.21246		1.0262
	0.022222	0.55556	0.022222	0.4		2.0693	0.84428	0.25289		0.98325
	0.071429	0.66667	0	0.2619		2.3616	1.0859	-0.47349		0.9375
	0.021739	0.80435	0	0.17391		1.7191	1.044	0.11129		0.99567
Mean	0.0439155	0.607381	0.00480779	0.343894
	Figure 4 - figure supplements 1E			Figure 4 - figure supplements 1F
	Latency(s)	Events/min		Wake	NREM	REM
	7.6756	1.2417		2.2735	0.9493	0.31795
	6.5719	1.4695		2.4786	1.0349	0.074859
	6.3712	1.7361		0.83276	1.6228	0.095555
	7.2742	1.3946		1.9856	1.3271	0.14024
	7.8763	1.4744		2.085	0.94589	-0.22731
	4.8662	1.4301		1.7963	1.0926	-0.027199
	7.6756	1.3238		2.2335	1.2408	-0.35961
	8.7793	1.5618		2.4396	1.4151	-0.15528
	7.8763	1.4179		2.5193	1.3192	-0.078189
	6.1706	1.646		2.071	0.97891	-1.2453
	3.8629	1.4866		1.8604	0.64916	-0.91237

## Sheet: Figure5
Figure 5D				Figure 5 - figure supplements 1C				Figure 5 - figure supplements 1D
DG-DRN correlation				Calcium activity (Z)				oscillation
Wake	NREM	REM		Wake	NREM	REM		cycle/min
0.49058	-0.65648	0.45706		0.48378	1.6499	2.398		1.05882
0.69895	-0.83258	0.4763		0.42967	1.5284	1.2912		0.970588
0.64762	-0.79756	0.43302		0.46727	1.4952	1.3585		1.26471
0.63399	-0.67742	0.4857		1.0025	1.2077	1.3757		1.82353
0.22894	-0.46812	-0.49379		0.90865	1.2854	1.6278		1.20588
0.26372	-0.63182	-0.47955		0.6148	1.4125	2.0001		0.823529
0.46281	-0.63848	-0.31997		1.5303	1.4844	0.99485		1.64706
0.43495	-0.67185	-0.5103		1.2003	1.3329	1.261		2.02941
0.23259	-0.74594	-0.098951		1.17	1.0007	0.61477		1.14706
0.47381	-0.72672	-0.5956		1.2115	1.5693	1.2179		1.44118
0.5172	-0.77187	-0.15354		0.88301	1.3458	NaN		1.26471
				0.95986	1.4056	1.4425		1.02941
				1.0526	1.235	1.7011		2.11765
				1.4946	1.2171	1.5839		1.67647
				1.2512	1.3386	1.7114		1.20588
				0.87921	1.4462	1.7882		0.823529

## Sheet: Figure6
Figure 6D						Figure 6F																Figure 6F
Oscillation power		Oscillation amp				Freezing% per min
WT	Htr1a	WT	Htr1a			GFP control																Averaged Freezing%
0.2193	0.2782	4.3237	2.7586			Time(min)	mouse#1	mouse#2	mouse#3	mouse#4	mouse#5	mouse#6	mouse#7	mouse#8	mouse#9	mouse#10	mouse#11	mouse#12	Mean	SEM		Cre	GFP
0.3114	0.2145	3.4082	1.9403			1	22.47	1.13	80.97	35.21	27.09	18.09	58.76	22.12	74.3	77.28	21.52	0.9	36.6533	8.3213		46.058	40.492
0.33064	0.24911	3.2681	3.5118			2	30.37	40	47.98	23.99	61.77	26.45	65.27	37.02	89.39	96.21	34.39	15.38	47.3517	7.43951		30.122	43.682
0.37331	0.2684	3.7814	3.5715			3	44.31	43.95	80.04	34.6	74.13	14.61	75.84	34.19	95.52	88.22	9.23	17.57	51.0175	8.78843		61.644	73.97
0.30375	0.16235	3.539	2.6474			4	35.58	70.91	76.21	50.78	75.39	22.89	61.78	37.09	100	56.89	12.72	20.54	51.7317	7.68063		15.87	39.142
0.33461	0.26106	3.7457	3.0302			5	69.73	62.42	84.65	51.13	56.77	28.78	79.4	39.55	86.25	86.83	43.68	18.85	59.0033	6.69869		23.86	59.03
0.28269	0.2136	4.5623	3.0587																			47.752	22.164
0.24607	0.22429	3.3384	2.2098			Cre																22.56	68.21
0.33236	0.2989	3.4724	2.2674			Time(min)	mouse#1	mouse#2	mouse#3	mouse#4	mouse#5	mouse#6	mouse#7	mouse#8	mouse#9	mouse#10	mouse#11		Mean	SEM		24.342	33.994
0.35573	0.21167	3.1871	2.0273			1	57.33	33.93	51.42	15.08	18.14	26.01	17.71	23.4	27.42	5.91	20.57		26.9927	4.64309		24.188	89.092
0.34806	0.21566	3.245	2.9873			2	59.75	47.87	63.22	26.7	20.78	60.41	25.34	32.32	16.86	5.15	22.72		34.6473	6.00102		10.452	81.086
0.21814	0.30531	3.1932	3.0291			3	48.54	41.93	72.1	8.77	38.81	56.98	15.09	44.82	40.99	0	23.42		35.5864	6.52091		23.516	24.308
0.23272	0.35779	3.1315	3.2136			4	36.27	10.04	62.29	10.85	32.09	70.76	24.55	12.08	29.53	10.29	30.87		29.9655	6.21809			14.648
0.31675	0.19257	3.2439	2.4285			5	28.4	16.84	59.19	17.95	9.48	24.6	30.11	9.09	6.14	30.91	20		22.9736	4.45945
0.34949	0.18821	3.3636	2.6992
0.31493	0.1795	2.8617	2.7565
Figure 6 - figure supplements 2A										Figure 6 - figure supplements 2C
sleep analysis										calcium activity during MAs
Wake		NREM		REM		MA/NREM/h				Latency(s)		Calcium drop (Z)
WT	Htr1a	WT	Htr1a	WT	Htr1a	WT	Htr1a			WT	Htr1a	WT	Htr1a
39.2122	56.1667	53.5433	42.1204	7.24444	1.71296	42.2088	75.3792			1.8562	8.2776	-1.3686	-1.0565
34.75	27.2917	59.0556	62.7963	6.19444	9.91204	67.5917	55.3377			4.6656	7.1739	-2.0532	-0.9748
66.3389	49.3102	28.9944	45.2269	4.66667	5.46296	60.3564	41.0892			3.4615	7.0736	-1.8366	-1.6042
46.7729	50.9949	47.4058	44.5051	5.82126	4.5	49.893	69.2465			7.0736	7.6756	-2.1447	-1.4388
51.4028	40.4352	42.4954	53.25	6.10185	6.31481	57.8494	64.4757			5.9699	9.4816	-1.4674	-0.9359
										2.0569	8.4783	-1.3654	-1.0446
										3.4615	2.4582	-2.4801	-1.315
										4.8662	7.4749	-1.5514	-0.7668
										5.0669	7.0736	-1.3905	-0.9499
										2.9599	5.8696	-1.343	-0.6126
										4.2642	7.1739	-1.1707	-1.1344
										5.6689	9.4816	-1.1724	-1.2321
										1.2542	5.7692	-1.0078	-1.4432
										7.4749	4.7659	-1.1696	-0.9974
										7.2742	4.3645	-1.3072	-1.15
										7.7759	3.8629	-1.155	-1.0415
